# Supplementary material for: Physicochemical properties of inclusion complexes of sanguinarine with natural cyclodextrins: spectroscopy, calorimetry and NMR studies
Source: Royal Society of Chemistry journal article supplement (doi:10.1039/c4ra10204e), 2014-11-28
Supplement: c4ra10204e1.pdf [file c4ra10204e1.pdf]

## **Electronic Supplementary Information**

### **Physiochemical properties of inclusion complexes of sanguinarine with natural cyclodextrins: spectroscopy, calorimetry and NMR studies**

Soumitra Hazra and Gopinatha Suresh Kumar\*

Biophysical Chemistry Laboratory, Chemistry Division, CSIR-Indian Institute of Chemical  
Biology, Kolkata 700 032, India

\*To whom correspondence should be addressed.

Phone: +91 33 2472 4049 /2499 5723

Fax: +91 33 2473 0284 / 5197

e-mail: [gskumar@iicb.res.in](mailto:gskumar@iicb.res.in)/[gskumar@csiriicb.in](mailto:gskumar@csiriicb.in)

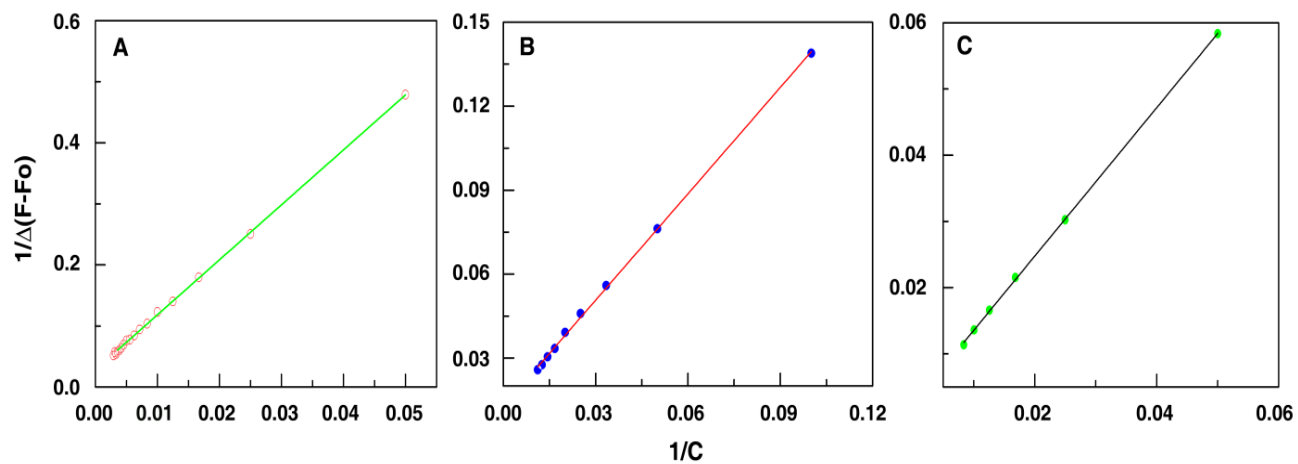

**Fig. S1** Double reciprocal Benesi–Hildebrand plots for the complexation of sanguinarine with (A)  $\alpha$ -, (B)  $\beta$ -, and (C)  $\gamma$ -CDs with correlation coefficient (R) 0.999, 0.9993 and 0.9998, respectively. Emission wavelength of sanguinarine used for the analysis was 564 nm.

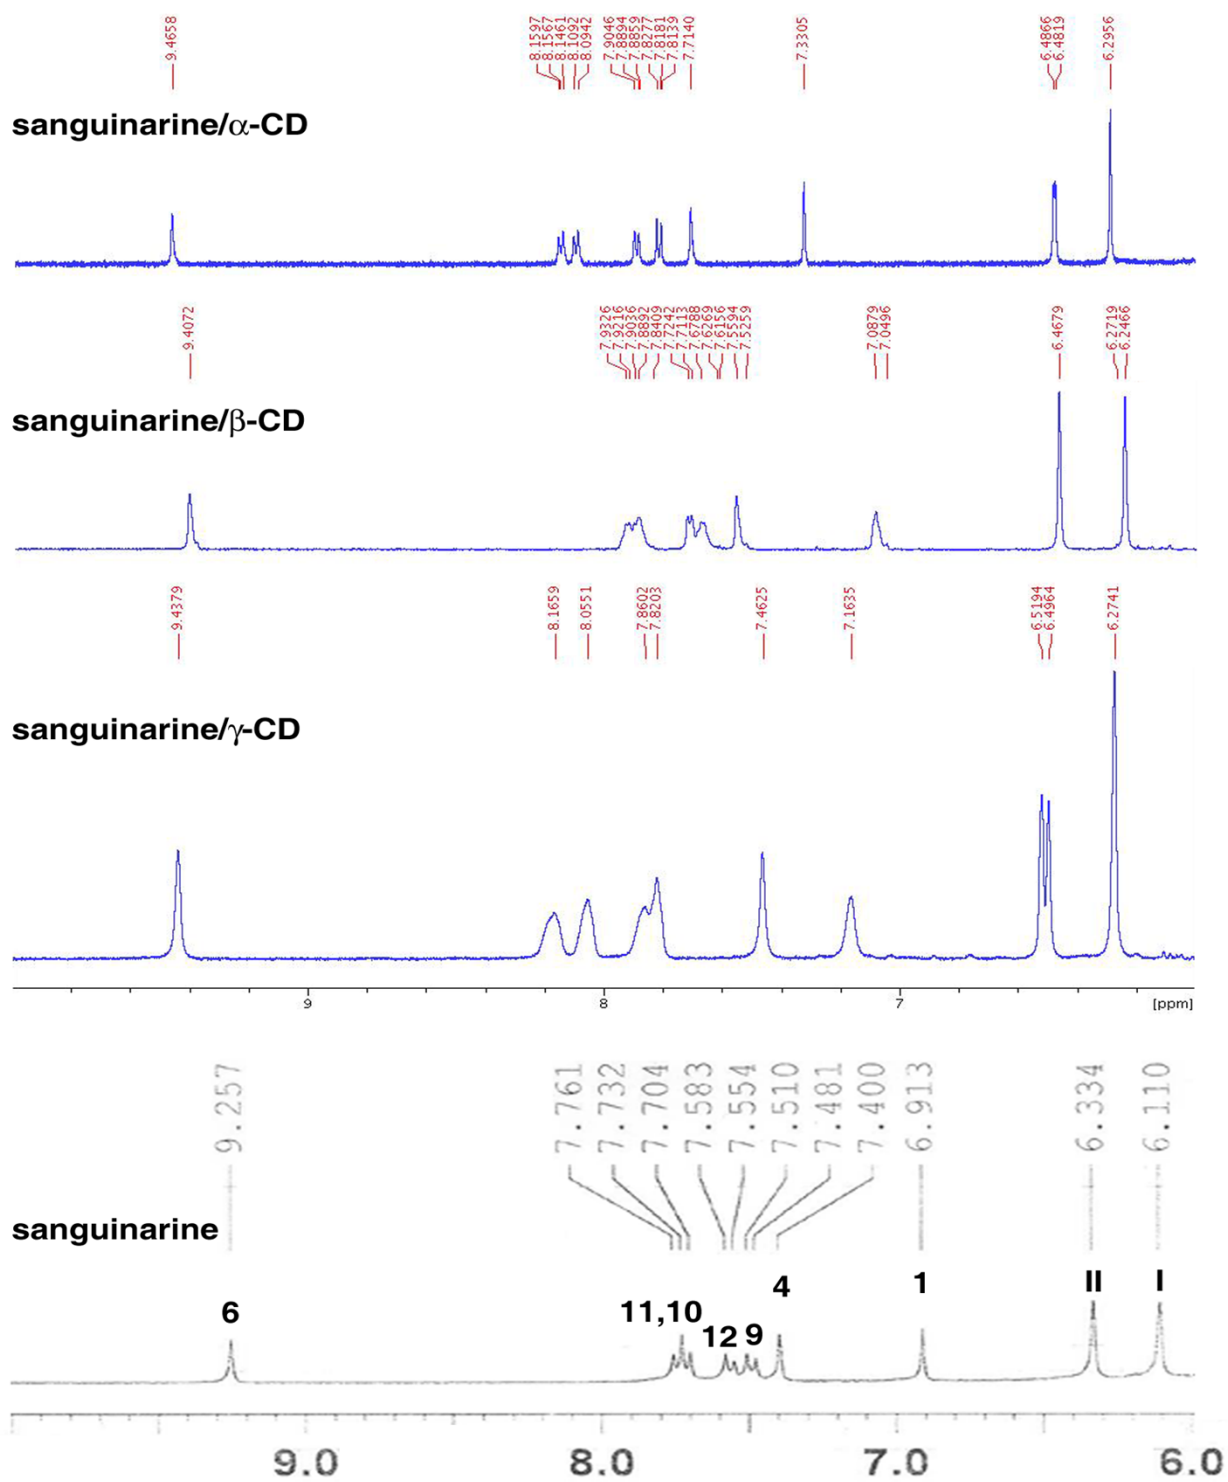

**Fig. S2** Selected region of chemical shifts of sanguinarine aromatic protons in the absence and presence of  $\alpha$ -,  $\beta$ -, and  $\gamma$ -CDs in  $D_2O$ .
